# Supplementary material for: Soluble CD40 Ligand in Aspirin-Treated Patients Undergoing Cardiac Catheterization
Source: PubMed Central journal article supplement (PMC4523196; doi:10.1371/journal.pone.0134599), 2015-08-03

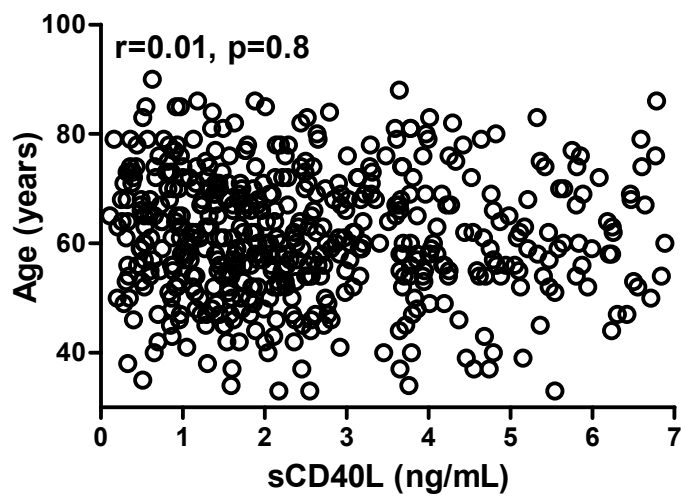

Supplement: pone.0134599.s002.pdf [file pone.0134599.s002.pdf]
